# Supplementary material for: Nanocomposites of Chitosan/Graphene Oxide/Titanium Dioxide Nanoparticles/Blackberry Waste Extract as Potential Bone Substitutes
Source: MDPI journal article supplement (doi:10.3390/polym13223877), 2021-11-10
Supplement: s1 [file s1]

Supporting information of

# Nanocomposites of Chitosan/Graphene Oxide/Titanium Dioxide Nanoparticles/BlackBerry Waste Extract as Potential Bone Substitutes

Carlos Humberto Valencia Llano <sup>1</sup>, Moisés A. Solano <sup>2</sup> and Carlos David Grande-Tovar <sup>2,\*</sup>

<sup>1</sup> Grupo Biomateriales Dentales, Escuela de Odontología, Universidad del Valle, Calle 4B # 36-00, 76001 Cali, Colombia; carlos.humberto.valencia@correounivalle.edu.co

<sup>2</sup> Grupo de Investigación de Fotoquímica y Fotobiología, Facultad de Ciencias, Programa de Química, Universidad del Atlántico, Carrera 30 Número 8-49, Puerto Colombia 081008, Colombia; madolfosolano@mail.uniatlantico.edu.co

\* Correspondence: carlosgrande@mail.uniatlantico.edu.co; Tel.: +57-5-3599-484

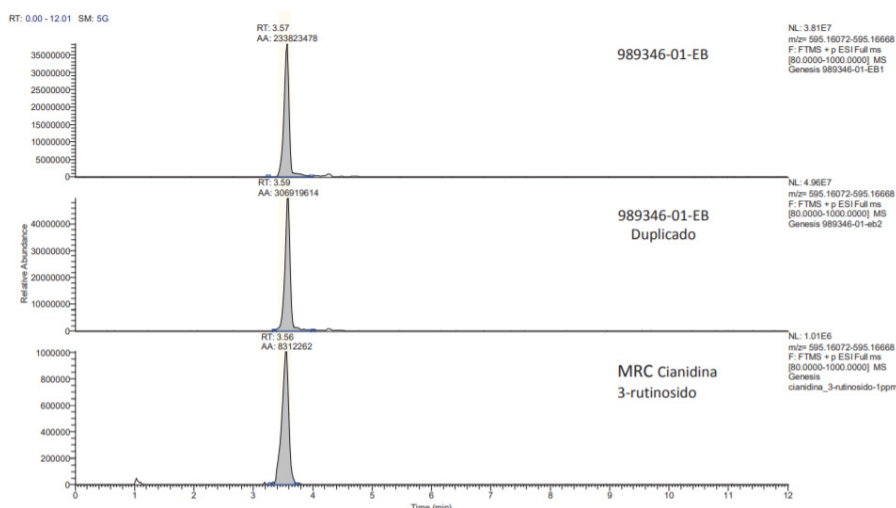

**Figure S1.** UHPLC chromatogram of anthocyanin cyanidin-3-rutinoside
